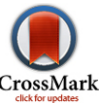

## Correction

# Correction: Two Intense Decades of 19<sup>th</sup> Century Whaling Precipitated Rapid Decline of Right Whales around New Zealand and East Australia

The *PLOS ONE* Staff

## Notice of Republication

This article was republished on April 11, 2014, to correct an error that marked coauthor Tim D. Smith as deceased. The publisher apologizes for this error. Please download this article again to view the correct version. The originally published, uncorrected article and the republished, corrected article are provided here for reference.

## Supporting Information

**File S1.** Originally published, uncorrected article.

**File S2.** Republished corrected article.

## Reference

1. Carroll EL, Jackson JA, Paton D, Smith TD (2014) Two Intense Decades of 19<sup>th</sup> Century Whaling Precipitated Rapid Decline of Right Whales around New Zealand and East Australia. *PLoS ONE* 9(4): e93789. doi:10.1371/journal.pone.0093789

**Citation:** The *PLOS ONE* Staff (2014) Correction: Two Intense Decades of 19<sup>th</sup> Century Whaling Precipitated Rapid Decline of Right Whales around New Zealand and East Australia. *PLoS ONE* 9(4): e96729. doi:10.1371/journal.pone.0096729

**Published:** April 25, 2014

**Copyright:** © 2014 The *PLOS ONE* Staff. This is an open-access article distributed under the terms of the Creative Commons Attribution License, which permits unrestricted use, distribution, and reproduction in any medium, provided the original author and source are credited.
